# Supplementary material for: Cutaneous Melanoma Systematic Diagnostic Workflows and Integrated Reflectance Confocal Microscopy Assessed with a Retrospective, Comparative Longitudinal (2009–2018) Study
Source: MDPI journal article supplement (doi:10.3390/cancers14030838), 2022-02-07
Supplement: s1 [file s1]

Supplementary

# Cutaneous Melanoma Systematic Diagnostic Workflows and Integrated Reflectance Confocal Microscopy Assessed with a Retrospective, Comparative Longitudinal (2009–2018) Study

Giovanni Pellacani, Francesca Farnetani, Johanna Chester, Shaniko Kaleci, Silvana Ciardo, Sara Bassoli, Alice Casari, Caterina Longo, Marco Manfredini, Anna Maria Cesinaro, Francesca Giusti, Antonio Iacuzio and Mario Migaldi

**Table S1.** Population statistics for the Province of Modena (2009–2018) according to age groups.

| Age groups | 2009    | 2010    | 2011    | 2012    | 2013    | 2014    | 2015    | 2016    | 2017    | 2018    |
|------------|---------|---------|---------|---------|---------|---------|---------|---------|---------|---------|
| 0–49       | 417,234 | 419,524 | 421,606 | 421,639 | 419,412 | 412,521 | 407,999 | 403,284 | 399,421 | 395,518 |
| 50–70      | 172,102 | 173,944 | 176,311 | 178,767 | 181,289 | 183,828 | 187,438 | 190,915 | 195,417 | 197,228 |
| >70        | 98,950  | 101,112 | 102,997 | 104,758 | 105,716 | 106,412 | 107,677 | 108,282 | 108,111 | 110,457 |
| Total      | 688,286 | 694,580 | 700,914 | 705,164 | 706,417 | 702,761 | 703,114 | 702,481 | 702,949 | 703,203 |

**Table S2.** Crude prevalence of melanoma over the study period, based on population statistics.

| Age groups | 2009 | 2010 | 2011 | 2012 | 2013 | 2014 | 2015 | 2016 | 2017 | 2018 |
|------------|------|------|------|------|------|------|------|------|------|------|
| 0–49 anni  | 1.5  | 1.9  | 1.4  | 1.6  | 1.2  | 2.1  | 2.1  | 3.1  | 3.2  | 4.1  |
| 50–70 anni | 4.8  | 5.1  | 3.7  | 3.7  | 4.5  | 6.9  | 7.2  | 8.9  | 8.6  | 13.0 |
| >70 anni   | 5.9  | 5.7  | 5.7  | 6.4  | 5.3  | 9.0  | 8.1  | 12.5 | 13.7 | 13.4 |
| Total      | 2.9  | 3.2  | 2.6  | 2.9  | 2.7  | 4.4  | 4.4  | 6.1  | 6.3  | 8.1  |

**Table S3.** Standardized prevalence of melanoma over the study period, based on estimates from 2009.

| Age groups | 2009 | 2010 | 2011 | 2012 | 2013 | 2014 | 2015 | 2016 | 2017 | 2018 |
|------------|------|------|------|------|------|------|------|------|------|------|
| 0–49       | 1.5  | 1.9  | 1.4  | 1.6  | 1.2  | 2.1  | 2.0  | 3.0  | 3.0  | 3.9  |
| 50–70      | 2.0  | 5.1  | 3.8  | 3.9  | 4.8  | 7.3  | 7.8  | 9.8  | 9.8  | 14.9 |
| >70        | 1.4  | 5.9  | 6.0  | 6.8  | 5.7  | 9.7  | 8.8  | 13.6 | 15.0 | 15.0 |
| Total      | 2.9  | 3.3  | 2.7  | 2.9  | 2.7  | 4.5  | 4.4  | 6.2  | 6.4  | 8.2  |

**Table S4.** All lesions. Melanoma. Nevi and respective NNEs according to location of excision at the Department of Dermatology (DP) or other health institutions in the province (NDP).

| Year | Melanoma |      | Nevi |      | Total |      |     | Thin |      | Thick |      |
|------|----------|------|------|------|-------|------|-----|------|------|-------|------|
|      | N        | %    | N    | %    | N     | %    | NNE | N    | %    | N     | %    |
| DP   |          |      |      |      |       |      |     |      |      |       |      |
| 2009 | 133      | 7.1  | 1744 | 92.9 | 1877  | 14.5 | 14  | 96   | 72.2 | 37    | 27.8 |
| 2010 | 99       | 6.3  | 1475 | 93.7 | 1574  | 12.1 | 16  | 79   | 79.8 | 20    | 20.2 |
| 2011 | 108      | 8.0  | 1244 | 92.0 | 1352  | 10.4 | 13  | 69   | 63.9 | 39    | 36.1 |
| 2012 | 92       | 9.9  | 836  | 90.1 | 928   | 7.2  | 10  | 58   | 63.0 | 34    | 37.0 |
| 2013 | 92       | 11.5 | 711  | 88.5 | 803   | 6.2  | 9   | 66   | 71.7 | 26    | 28.3 |
| 2014 | 163      | 17.5 | 768  | 82.5 | 931   | 7.2  | 6   | 126  | 77.3 | 37    | 22.7 |
| 2015 | 176      | 14.5 | 1041 | 85.5 | 1217  | 9.4  | 7   | 152  | 86.4 | 24    | 13.6 |
| 2016 | 220      | 16.3 | 1132 | 83.7 | 1352  | 10.4 | 6   | 179  | 81.4 | 41    | 18.6 |
| 2017 | 235      | 16.5 | 1187 | 83.5 | 1422  | 11   | 6   | 208  | 88.5 | 27    | 11.5 |
| 2018 | 310      | 20.4 | 1211 | 79.6 | 1521  | 11.7 | 5   | 282  | 91.0 | 28    | 9.0  |

|       |      |      |        |      |        |      |    |      |      |     |      |
|-------|------|------|--------|------|--------|------|----|------|------|-----|------|
| Total | 1628 | 12.5 | 11349  | 87.5 | 12977  | 100  | 8  | 1315 | 80.8 | 313 | 19.2 |
| NDP   |      |      |        |      |        |      |    |      |      |     |      |
| 2009  | 70   | 3.3  | 2066   | 96.7 | 2136   | 7.7  | 31 | 58   | 82.9 | 12  | 17.1 |
| 2010  | 126  | 4.6  | 2600   | 95.4 | 2726   | 9.8  | 22 | 113  | 89.7 | 13  | 10.3 |
| 2011  | 75   | 2.7  | 2706   | 97.3 | 2781   | 10   | 37 | 45   | 60.0 | 30  | 40.0 |
| 2012  | 109  | 3.9  | 2681   | 96.1 | 2790   | 10   | 26 | 85   | 78.0 | 24  | 22.0 |
| 2013  | 97   | 3.7  | 2522   | 96.3 | 2619   | 9.4  | 27 | 74   | 76.3 | 23  | 23.7 |
| 2014  | 146  | 5.4  | 2576   | 94.6 | 2722   | 9.8  | 19 | 129  | 88.4 | 17  | 11.6 |
| 2015  | 130  | 4.9  | 2518   | 95.1 | 2648   | 9.5  | 20 | 115  | 88.5 | 15  | 11.5 |
| 2016  | 209  | 7.2  | 2706   | 92.8 | 2915   | 10.5 | 14 | 180  | 86.1 | 29  | 13.9 |
| 2017  | 207  | 6.2  | 3120   | 93.8 | 3327   | 11.9 | 16 | 179  | 86.5 | 28  | 13.5 |
| 2018  | 257  | 8.1  | 2934   | 91.9 | 3191   | 11.5 | 12 | 231  | 89.9 | 26  | 10.1 |
| Total | 1426 | 5.1  | 26,429 | 94.9 | 27,855 | 100  | 20 | 1209 | 84.8 | 217 | 15.2 |
